# Supplementary material for: Development of an Amplicon Nanopore Sequencing Strategy for Detection of Mutations Conferring Intermediate Resistance to Vancomycin in Staphylococcus aureus Strains
Source: PubMed Central journal article supplement (PMC9927139; doi:10.1128/spectrum.02728-22), 2023-01-23
Supplement: spectrum.02728-22-s0001.pdf [file spectrum.02728-22-s0001.pdf]

**Supplementary Information for Development of an amplicon nanopore sequencing strategy for detection of mutations conferring intermediate resistance to vancomycin in *Staphylococcus aureus* strains**

Abraham G. Moller<sup>1,2</sup>, Robert A. Petit III<sup>1,3</sup>, Michelle H. Davis<sup>1</sup>, and Timothy D. Read<sup>1</sup>

<sup>1</sup>Division of Infectious Diseases, Department of Medicine, Emory University, Atlanta, GA, 30322

<sup>2</sup>Microbiology and Molecular Genetics (MMG), Graduate Division of Biological and Biomedical Sciences (GDBBS), Emory University, Atlanta, GA, 30322

<sup>3</sup>Theiagen Genomics, Highlands Ranch, CO, 80129

Supplementary Figure S1: Amplification of 10 VISA regions from N384 mutant template DNA extracted from pure culture. From left to right, the amplicons are *walRK*, *rpoB*, *graRS*, *vraFG*, *stpl*, *vraRS*, *agrA*, *sarA*, *clpP*, *ccpA*, *prsA*, and *yvqF*. The NEB 1 kb Plus ladder is shown for reference at left. The largest marker on the ladder is 10 kb and the smallest is 0.1 kb. The ladder and all amplicons were run at 110V for 30 minutes.

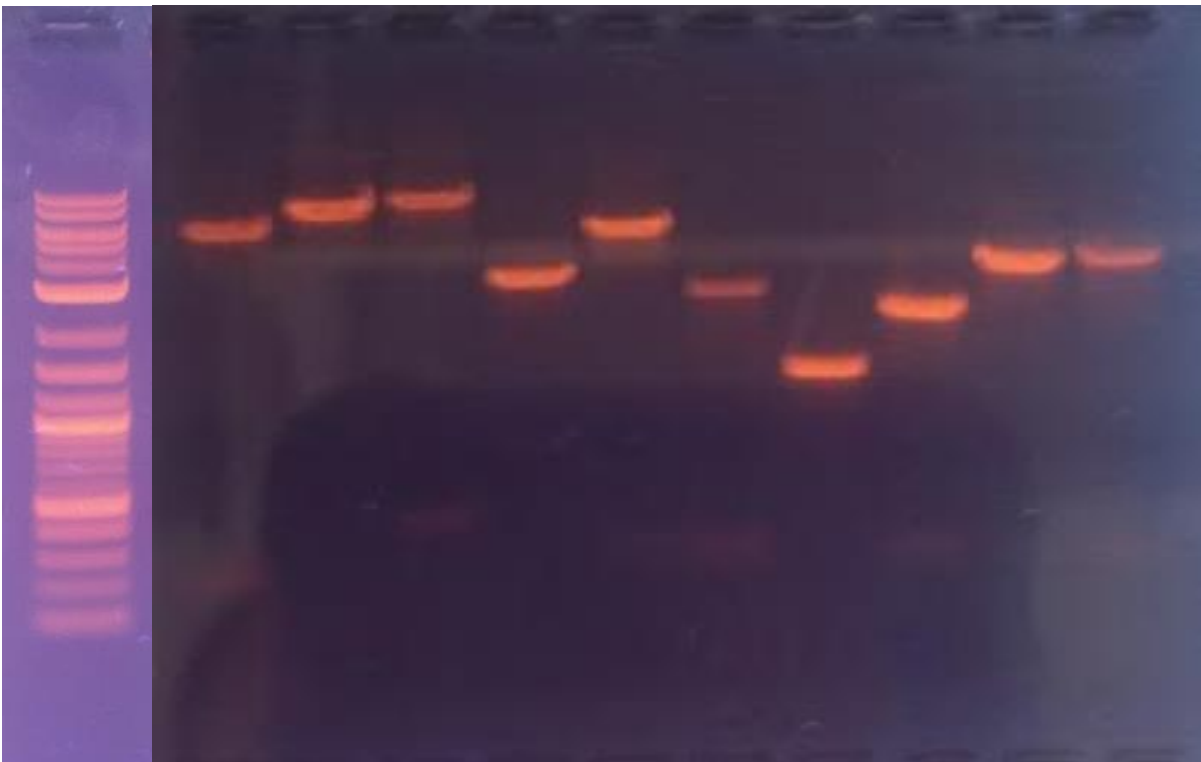

Supplementary Figure S2: Distributions of annotated variant types in VISA mutation database. Variants in 16 known VISA-associated genes were called in clinical VISA and lab-adapted VISA short read data against the Staph\_ASX reference with snippy and annotated with SnpEff. Variants in our curated database of 40,000+ *S. aureus* genomes and all possible simulated mutations in the VISA-associated genes were also annotated with SnpEff. Proportions of high, moderate, and low effect mutations are marked in red, blue and green, respectively. Either raw mutation counts (A) or proportions (B) are shown for each gene and mutation effect class, respectively.

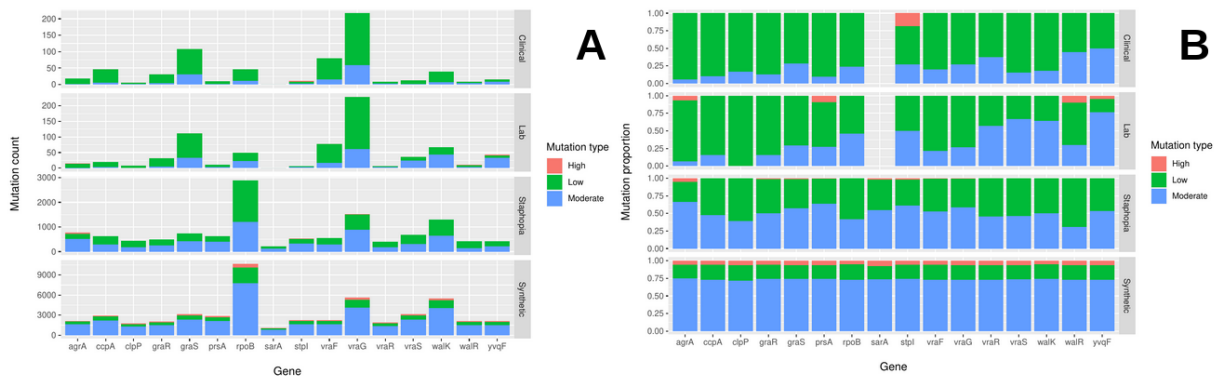

Supplementary Table S1: Primers used for amplifying each of 10 regions containing genes likely to contain VISA-conferring mutations, melting temperatures calculated for each primer with the NEB Tm calculator, and amplified region sizes.

| ID 1          | Primer 1 sequence     | Tm 1 | ID 2          | Primer 2 sequence    | Tm 2 | Amplicon size |
|---------------|-----------------------|------|---------------|----------------------|------|---------------|
| walRK F       | GATTCCCGTCGAGACCGTAC  | 67   | walRK R       | CGCTTCATCTTCGGACAGGT | 67   | 4546          |
| rpoB F        | GCGAATTGCCGATGTTGGTT  | 67   | rpoB R        | TGCAACGAATTGACCTGGGT | 67   | 5551          |
| graRS-vraFG F | GCTTTGAAGTTGACTGCCGG  | 67   | graRS-vraFG R | AGCAGCACGATCCAGATTGA | 66   | 6493          |
| stpI F        | AAGCTTACACGCCGCAAAG   | 67   | stpI R        | CTGATGATGAGCAGGCCAT  | 67   | 2743          |
| vraRS-yvqF F  | CATATGGCAGTATCGCGGGT  | 67   | vraRS-yvqF R  | ATGGGCTTTTGAACGAGCG  | 66   | 4363          |
| agrA F        | GAAGATGACATGCCTGCCT   | 68   | agrA R        | TTGATACAACTGGGGCAGGG | 67   | 2414          |
| sarA F        | GCGGTGGCAATTCGTTTCATT | 67   | sarA R        | TCGGGCAAATGTATCGAGCA | 67   | 2373          |
| clpP F        | CGACATTGCGGGATTCTCTG  | 66   | clpP R        | TTGTCATCGGTCGTTTCGGT | 67   | 2597          |
| ccpA F        | CTCAACCTGGTCGAGCAAGT  | 67   | ccpA R        | TTGCACTTAGTGATGCGGGT | 67   | 2944          |
| prsA F        | ATCCCCACTTTCGCGTTTCA  | 67   | prsA R        | GCACCTTTATCACCGGCAGA | 68   | 2960          |

Supplementary Table S2: Coverage at earliest time point (10 minutes) as determined from NanoPlot sequence yield over time analysis.

| Sample/strain | Type    | Time (min) | Yield (Gb) | Genome size (kb) | Coverage |
|---------------|---------|------------|------------|------------------|----------|
| EUH15         | Culture | 10         | 0.0174     | 36.984           | 469.826  |
| 107           | Culture | 10         | 0.0176     | 36.984           | 474.744  |
| N384 100      | Culture | 10         | 0.0194     | 36.984           | 523.889  |
| N384 90       | Culture | 10         | 0.0134     | 36.984           | 363.160  |
| N384 50       | Culture | 10         | 0.0164     | 36.984           | 444.760  |
| N384 10       | Culture | 10         | 0.0141     | 36.984           | 379.901  |
| N384 0        | Culture | 10         | 0.0215     | 36.984           | 580.936  |
| N384 100      | DNA     | 10         | 0.0133     | 36.984           | 359.094  |
| N384 90       | DNA     | 10         | 0.0116     | 36.984           | 314.859  |
| N384 50       | DNA     | 10         | 0.0191     | 36.984           | 516.244  |
| N384 10       | DNA     | 10         | 0.0166     | 36.984           | 448.888  |
| N384 0        | DNA     | 10         | 0.0112     | 36.984           | 301.671  |
